# Supplementary material
Source: PubMed Central journal article supplement (PMC7902378)
Supplement: NIHMS1646466-supplement-1.pdf [file NIHMS1646466-supplement-1.pdf]

## Supplemental Table I

### Antibodies

| Target antigen                               | Vendor or Source          | Catalog #  | Working concentration                     |
|----------------------------------------------|---------------------------|------------|-------------------------------------------|
| $\alpha$ 5 integrin                          | Abcam                     | ab150361   | 1:1000(WB)<br>1:250 (ICC)                 |
| $\beta$ 1 integrin                           | Santa Cruz                | sc-374429  | 1:1000 (WB)                               |
| Active $\beta$ 1 integrin (9EG7)             | BD Biosciences            | #553715    | 1:250 (ICC)                               |
| $\beta$ -tubulin                             | Cell Signaling Technology | #2128      | 1:000 (WB)                                |
| AKT 1/2                                      | Santa Cruz                | sc-1619    | 1:500 (WB)                                |
| P-AKT (Ser473)                               | Cell Signaling Technology | #4060      | 1:1000 (WB)                               |
| CD31                                         | Santa Cruz                | Sc-1506    | 4 $\mu$ g/mL (IHC)                        |
| CD68                                         | Cell Signaling Technology | #76437     | 1:400 (IHC)                               |
| P-eNOS (Ser1177)                             | Cell Signaling Technology | #9571      | 1:500 (WB)                                |
| ERK1/ERK2                                    | Santa Cruz                | sc-94      | 1:5000 (WB)                               |
| P-p44/42 MAPK (ERK1/2) (Y204)                | Cell Signaling Technology | #4370      | 1:1000 (WB)                               |
| Fibronectin                                  | Sigma Aldrich             | F3648      | 1:5000(WB)                                |
| GAPDH                                        | Cell Signaling Technology | #2118      | 1:5000 (WB)                               |
| GST                                          | Santa Cruz                | sc-1511    | 1:5000 (WB)                               |
| ICAM-1                                       | Santa Cruz                | sc-138     | 1:200 (WB)                                |
| ILK                                          | Cell Signaling Technology | 3856       | 1:000 (WB)                                |
| Mac2                                         | Accurate Chemical         | CL8942AP   | 0.1 $\mu$ g/mL (IHC)                      |
| NF- $\kappa$ B (p65 subunit)                 | Cell Signaling Technology | #4764      | 1:1000 (WB)<br>1:200 (ICC)<br>1:200 (IHC) |
| Phospho-NF- $\kappa$ B (Ser536, p65 subunit) | Cell Signaling Technology | #3033      | 1:1000 (WB)                               |
| Smooth Muscle Actin                          | Sigma Aldrich             | C6198      | 2.5 $\mu$ g/ml (IHC)                      |
| Paxillin                                     | Cell Signaling Technology | #2542      | 1:1000 (WB)                               |
| Paxillin                                     | Abcam                     | Ab32115    | 1:100 (ICC)                               |
| Talin1                                       | Cell Signal Technology    | #4021      | 1:1000 (WB)<br>1:500 (ICC)                |
| Tensin 1                                     | Sigma Aldrich             | SAB4200283 | 1:1000 (WB)<br>1:500 (ICC)                |
| VCAM-1                                       | Abcam                     | Ab134047   | 1:1000 (WB)<br>1:100 (IHC)                |
| Vinculin                                     | Sigma Aldrich             | V4139      | 1:400 (ICC)                               |

### qRT-PCR Primers

| Gene                    | Species | Forward                | Reverse                 |
|-------------------------|---------|------------------------|-------------------------|
| $\beta$ 2-microglobulin | Mouse   | TTCTGGTGCTTGTCTCACTGA  | CAGTATGTTTCGGCTTCCCATTC |
| FN1                     | Mouse   | ATGTGGACCCCTCCTGATAGT  | GCCCAGTGATTTTCAGCAAAGG  |
| ICAM-1                  | Mouse   | CTGGCTGTACAGAACAGGA    | AAAGTAGGTGGGGAGGTGCT    |
| KLF-2                   | Mouse   | AGAATGCACCTGAGCCTGCTAG | AATTTCCCCGAAAGCCTGC     |
| Rpl13a                  | Mouse   | GGGCAGGTTCTGGTATTGGAT  | GGCTCGGAAATGGTAGGGG     |
| VCAM-1                  | Mouse   | TCAAAGAAAGGGAGACTG     | GCTGGAGAAGCTTCATTATC    |

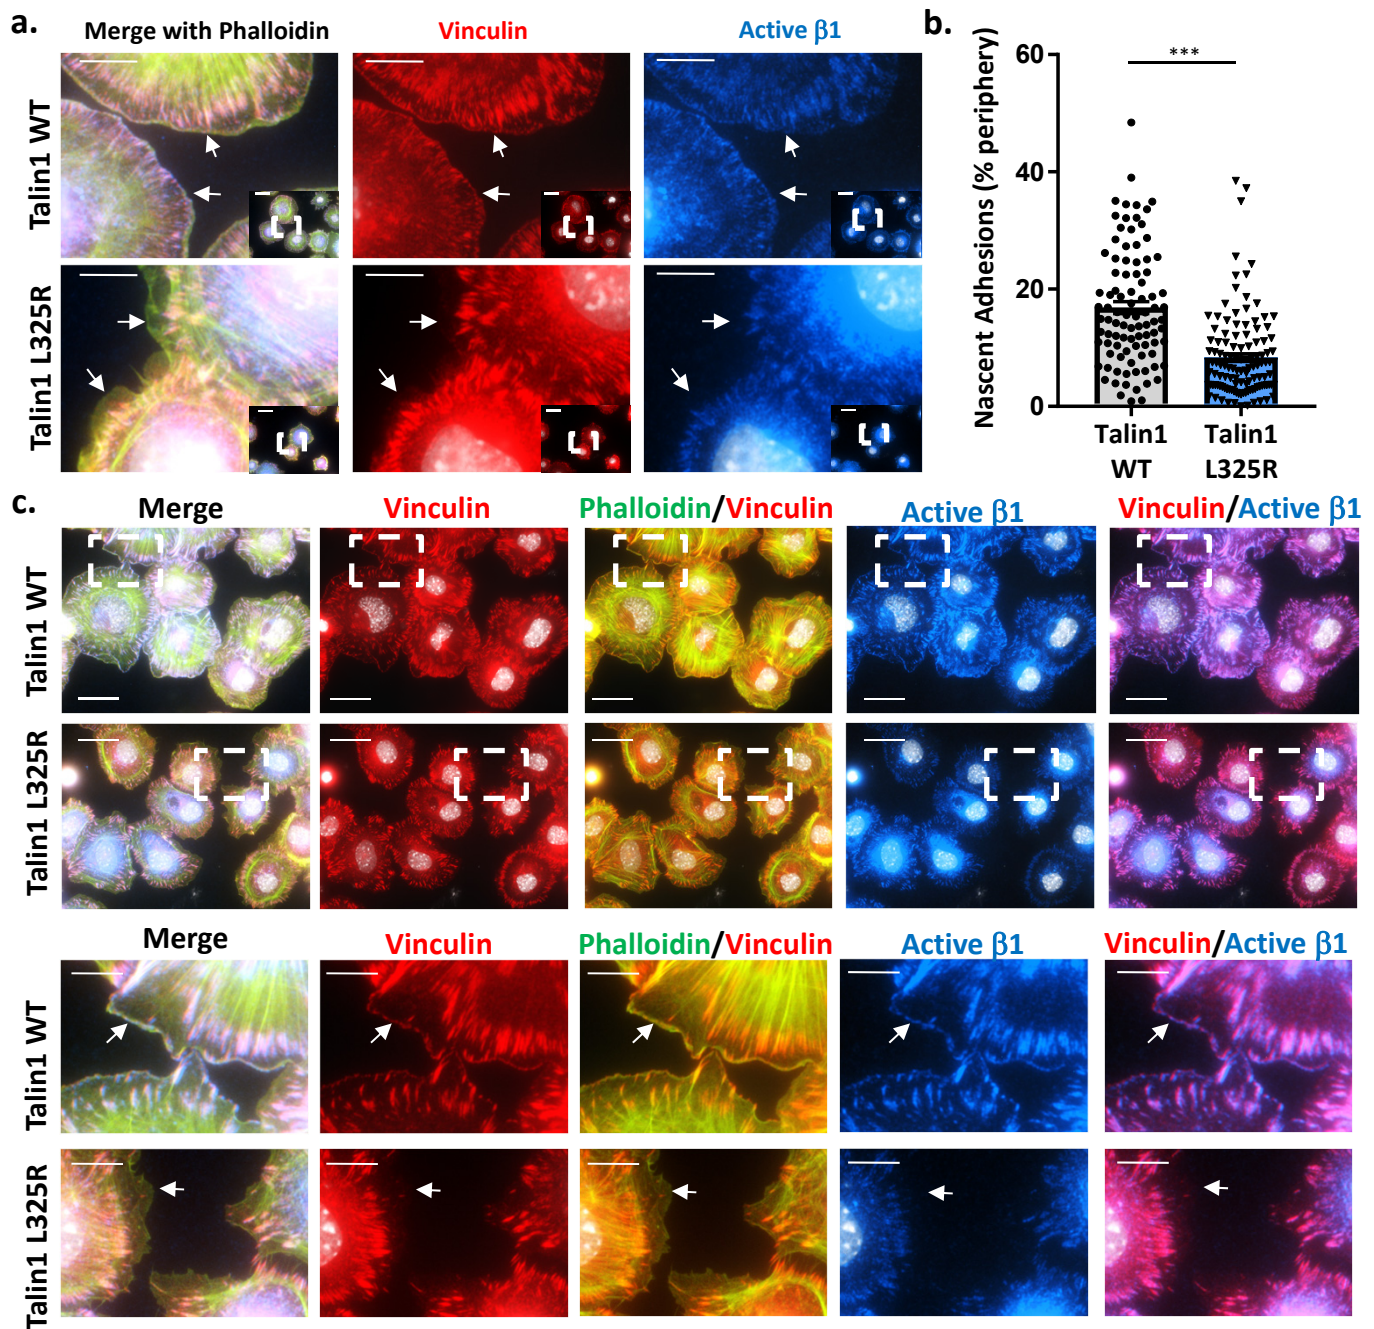

**Supplemental Figure I. Talin1 L325R Mutation Limits Nascent Adhesion Formation.**

Talin1 WT and Talin1 L325R cells were plated on fibronectin for 30 minutes and stained for actin (phalloidin, green), vinculin (red), and active (high affinity)  $\beta 1$  (blue). a) Representative micrographs are shown with 60x inset. Scale bars = 10  $\mu\text{m}$  and 20  $\mu\text{m}$  in inset. b) Nascent adhesions were identified as vinculin and  $\beta 1$  integrin positive within 1  $\mu\text{m}$  of the cell edge. Percent of the cell periphery positive for nascent adhesions (active  $\beta 1$ ) were quantified for individual cells from each of three independent experiments. c) Additional images of altered nascent adhesion formation between Talin1 WT and Talin1 L325R endothelial cells. Representative micrographs are shown with 60x inset. Scale bars = 10  $\mu\text{m}$  and 20  $\mu\text{m}$  in inset. Representative micrographs from one of three independent experiments are shown. \*\*\* $p < 0.001$ . Statistical analysis was performed using Student's t-test.

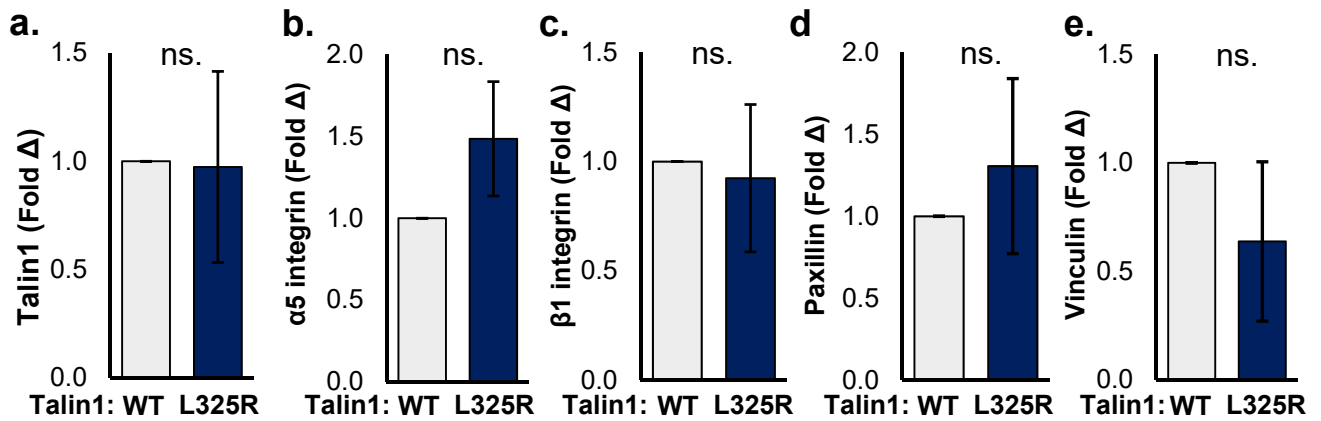

**Supplemental Figure II. Talin1 L325R Mutation Does Not Alter Focal Adhesion Structure.** Talin1 WT and Talin1 L325R endothelial cells were plated on fibronectin, and focal adhesions were extracted. Quantification of the Western blots for focal adhesion proteins shown in Figure 1F are provided, including a) talin1, b)  $\alpha$ 5, c)  $\beta$ 1, d) paxillin, and e) vinculin. n=4. n.s. indicates not significant. Statistical analysis was performed using Student's t-test.

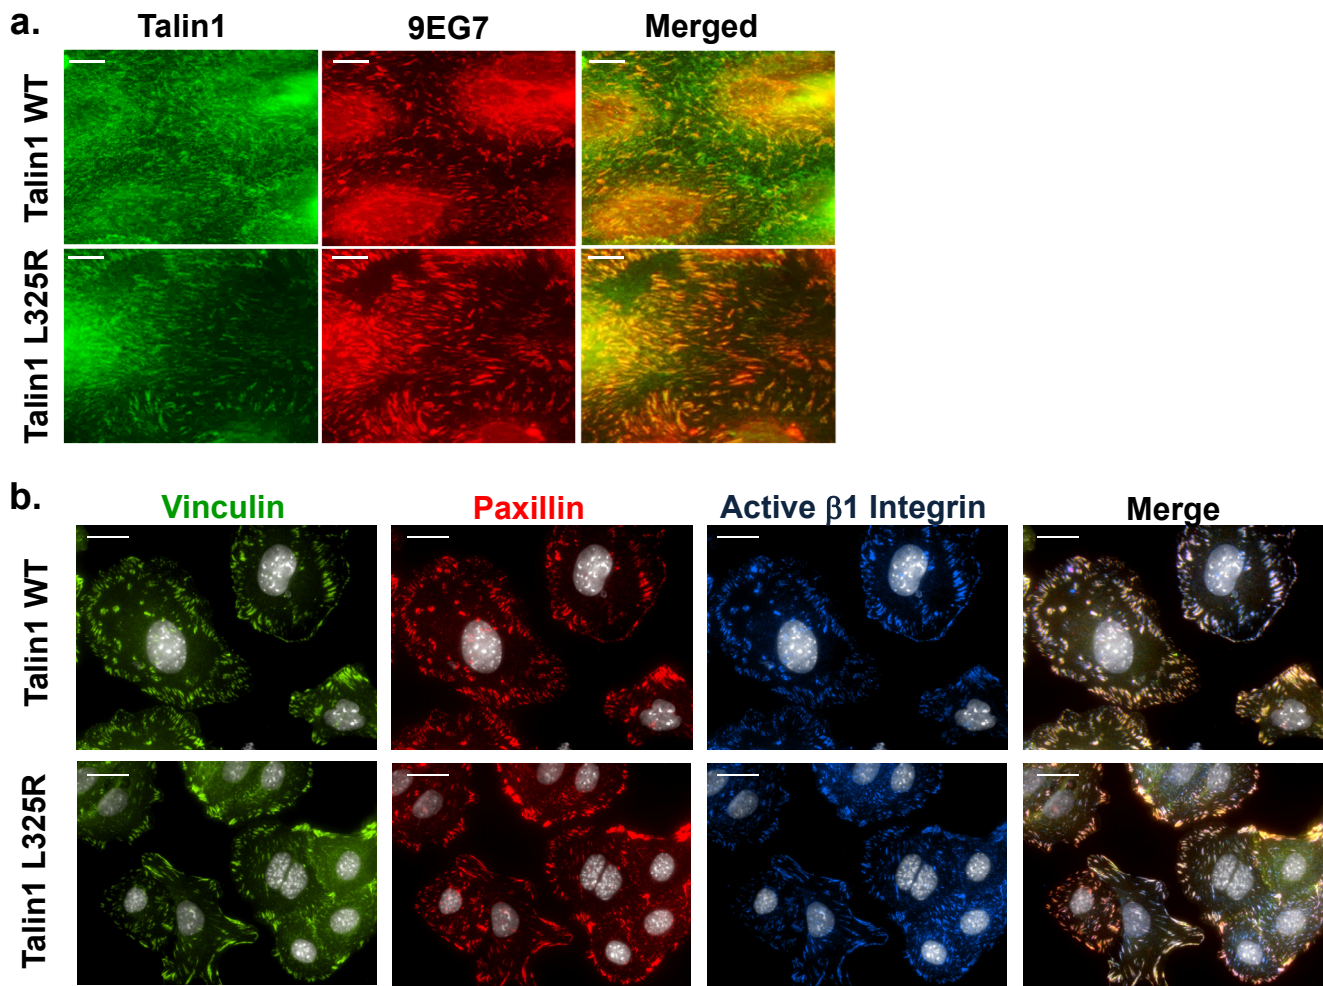

**Supplemental Figure III. Talin1 L325R Mutation Does Not Alter Focal Adhesion Structure.** a) Talin1 WT and Talin1 L325R MLECs were plated on fibronectin for 120 min, and talin1 (green) recruitment into focal adhesions (9EG7 (active  $\beta$ 1 integrins), red) was assessed by immunocytochemistry. Representative images are shown. n=3. b) Talin1 WT and Talin1 L325R MLECs were plated as in (a), and the recruitment of the focal adhesion proteins vinculin (green), paxillin (red), and active  $\beta$ 1 integrin (blue) was assessed by immunocytochemistry. Scale bars = 20  $\mu$ m. Representative images are shown. n=3.

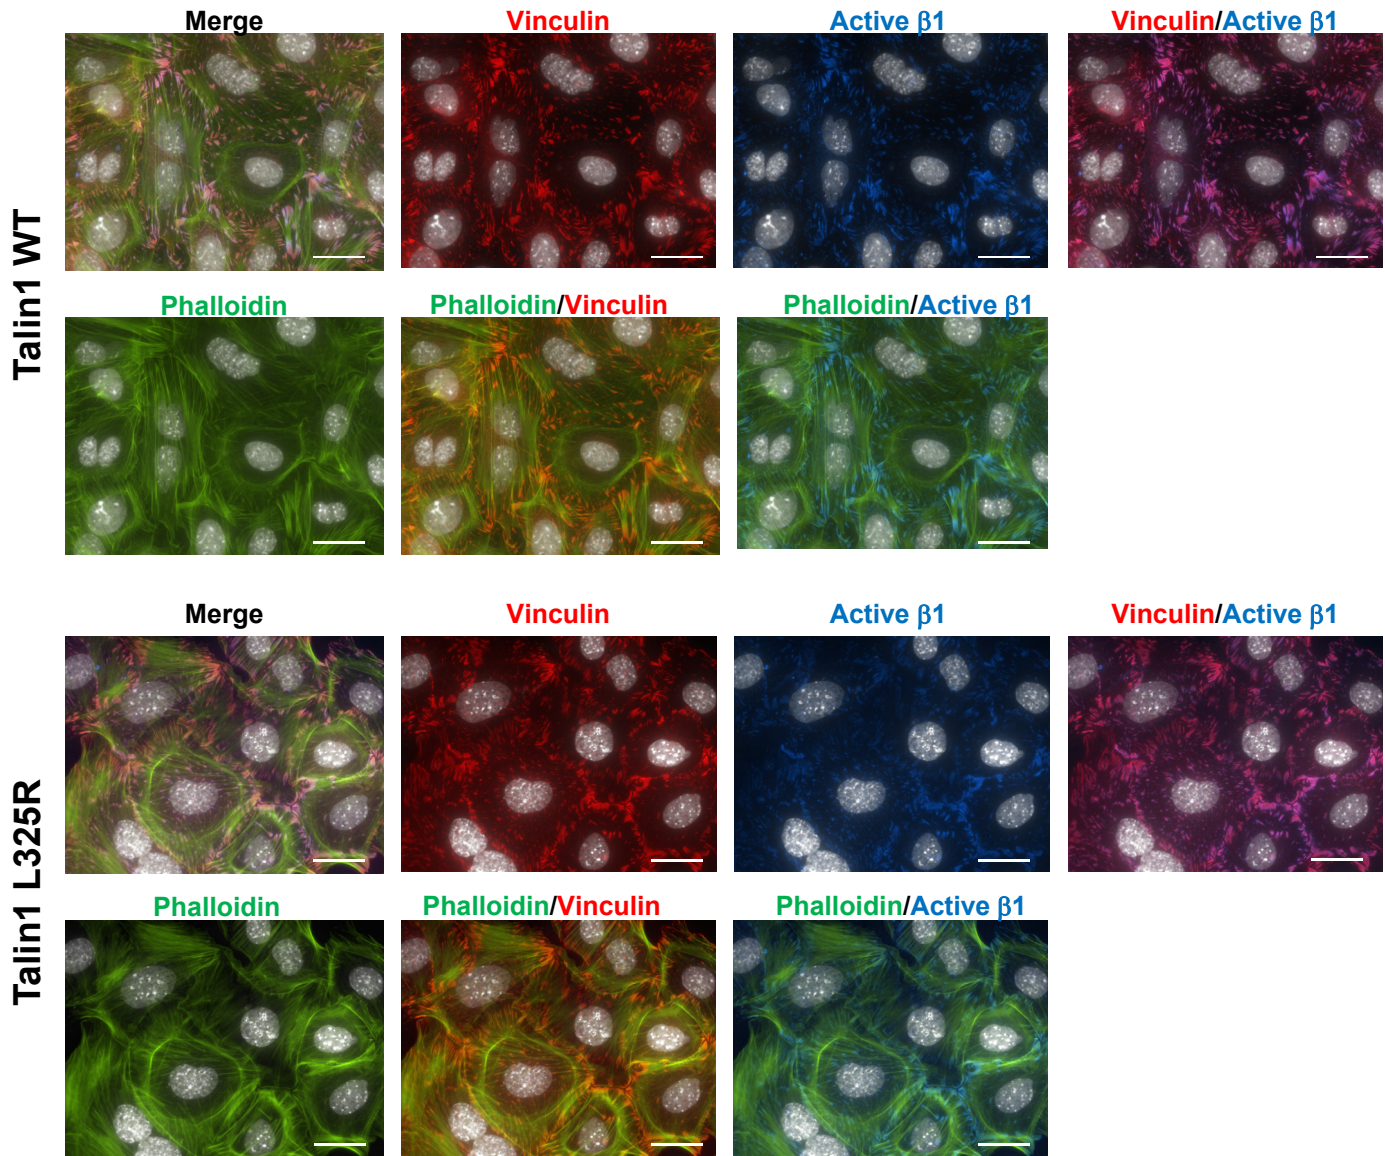

**Supplemental Figure IV. Talin1 WT and Talin1 L325R Endothelial Cells Show Similar Focal Adhesion Formation.** Talin1 WT and Talin1 L325R cells were plated on fibronectin for 120 minutes and stained for actin (phalloidin, green), vinculin (red), and active (high affinity)  $\beta 1$  (blue). Representative 60X micrographs are shown. Scale bars = 20  $\mu\text{m}$ . Representative micrographs from one of three independent experiments are shown.

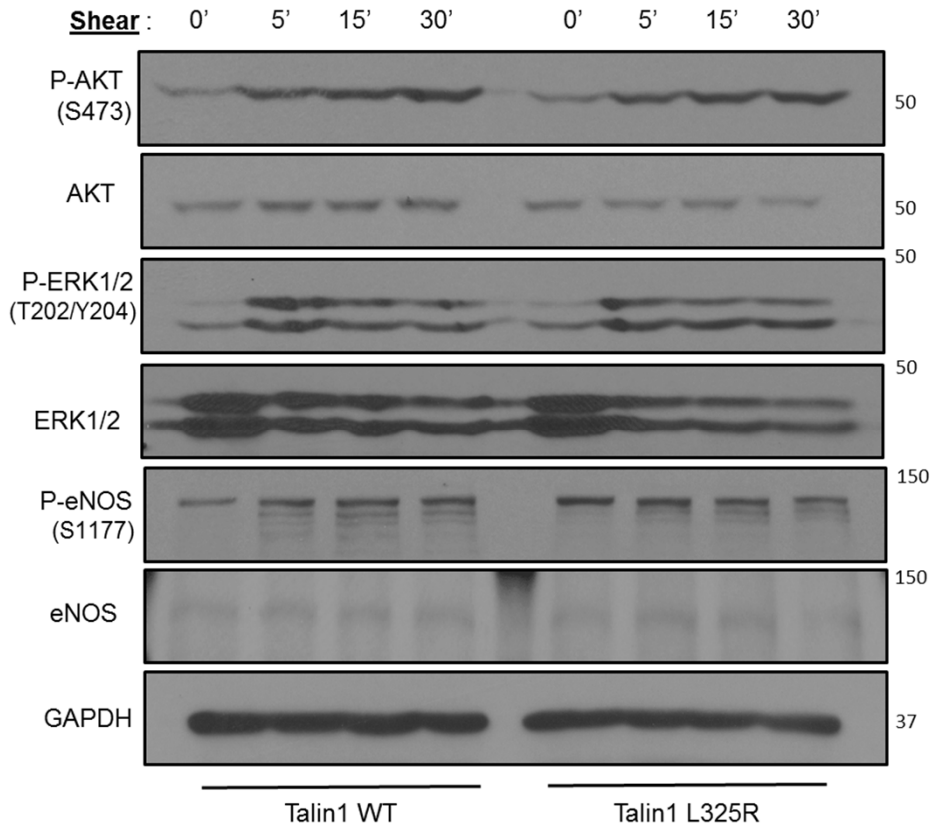

**Supplemental Figure V. Talin1-dependent Integrin Activation isn't required for Shear Stress-Induced AKT/ERK/eNOS signaling.** Talin1 WT and Talin1 L325R cells were exposed to acute onset of laminar shear stress for the indicated time points. Activation of known shear stress-sensitive pathways, such as extracellular signal-regulated kinase 1/2 (ERK1/2), Akt, and endothelial nitric oxide synthase (eNOS), was assessed by Western blotting using phospho-specific antibodies. Representative images are shown. n=3.

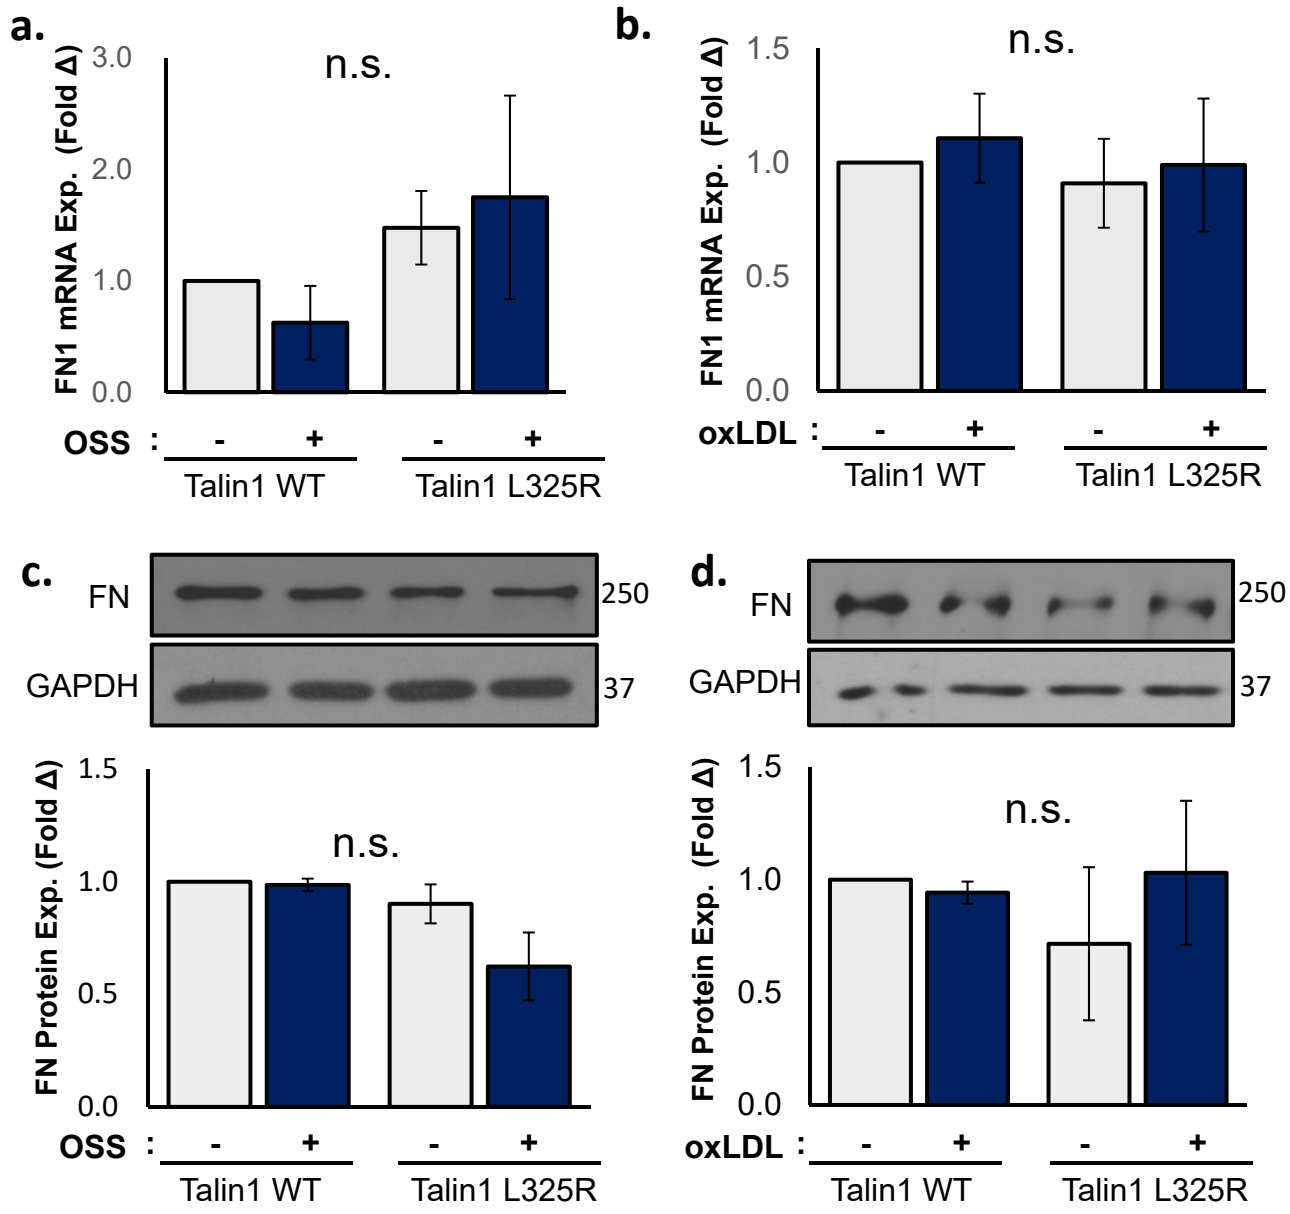

**Supplemental Figure VI. Intact Fibronectin Expression in Talin1 L325R Cells .**

Talin1 WT and Talin1 L325R MLECs were plated on basement membrane proteins (diluted matrigel) and either (a,c) exposed to OSS (18 hrs) or (b,d) treated with oxLDL (100  $\mu$ g/ml, 24 hrs). Fibronectin (FN) expression was determined by (a/b) qRT-PCR normalized to Rpl13a and  $\beta$ 2-macroglobulin or by (c/d) Western blot normalized to GAPDH. n=3. Statistical analysis utilized Two-Way ANOVA with Bonferroni posttest. n.s. indicates not significant.

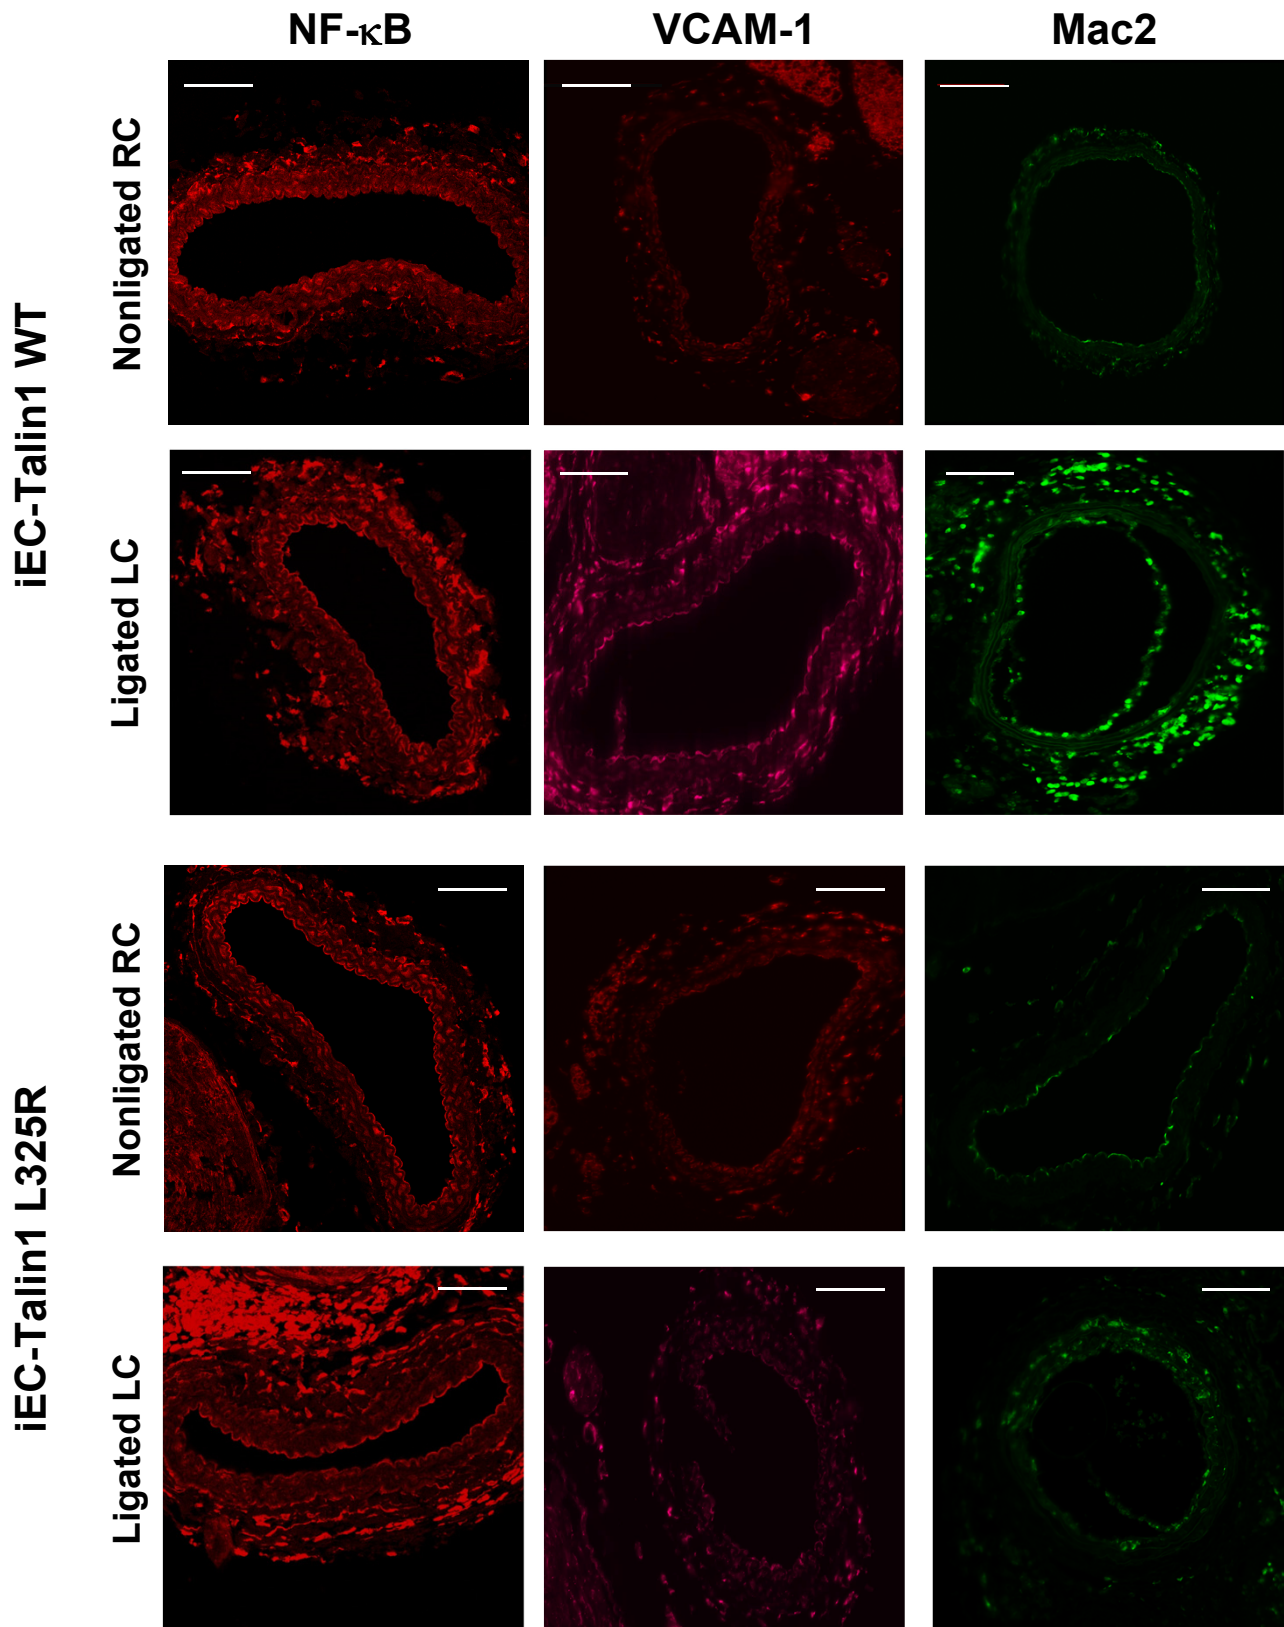

**Supplemental Figure VII. Lack of inflammation in the unligated right carotids.** Seven days after partial carotid ligation of the left carotid, inflammation in the carotid arteries was assessed by immunocytochemistry for NF- $\kappa$ B (red), VCAM-1 (red), and Mac2 (green). Right carotid controls show very limited inflammatory markers in this model. Scale bars = 100  $\mu$ m. Representative images are shown. n=5-6.



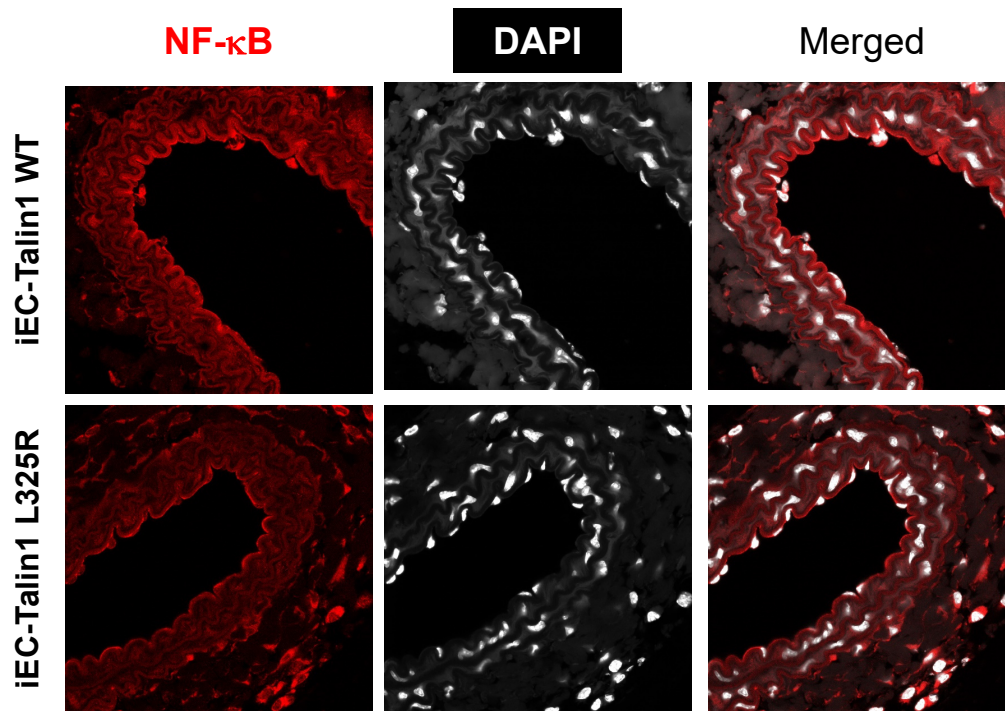

**Supplemental Figure VIII. Individual channels for NF- $\kappa$ B localization.** Seven days after partial carotid ligation in the left carotid, NF- $\kappa$ B (red) activation was assessed by nuclear localization, visualized by colocalization with the nuclear stain DAPI (pseudocolored white). Representative images are shown. n=5-6.

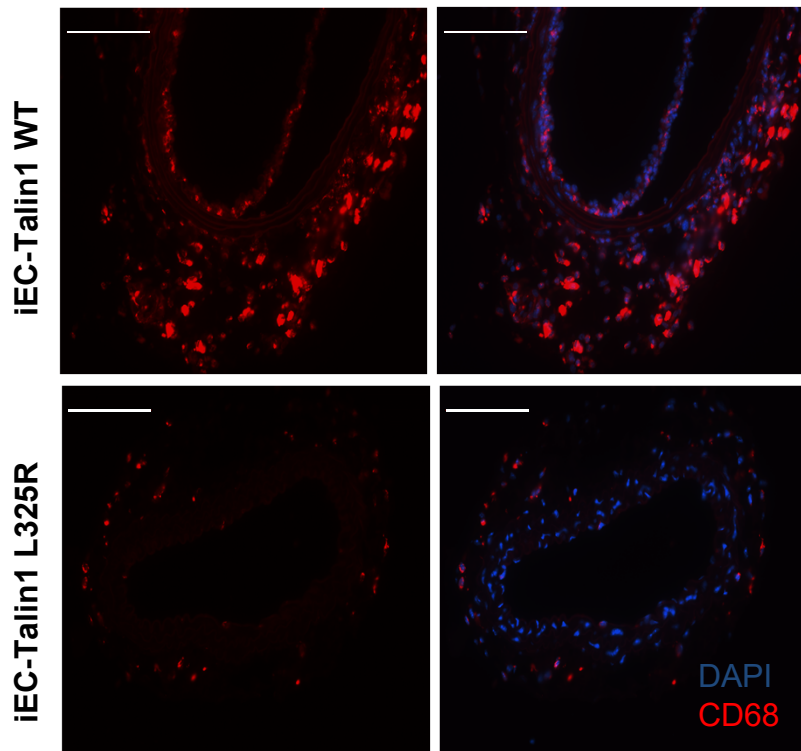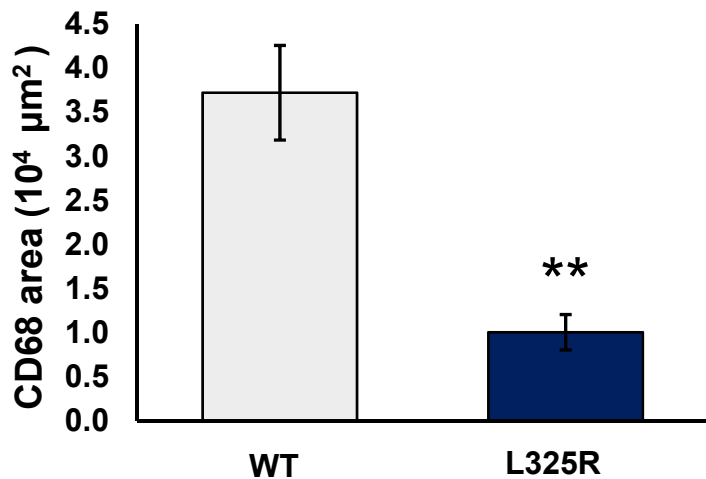

**Supplemental Figure IX. Reduced Macrophage Accumulation in Mice Harboring Talin1 L325R in Endothelium.** Seven days after partial carotid ligation in the left carotid, immunohistochemistry was performed for CD68 (red) to visualize myeloid cells in this tissue. Representative images are shown. n=5-6. Values are means  $\pm$ SE. \*\*p<0.01 compared with iEC-Talin1 WT. Scale bars = 100  $\mu$ m. Student's t-test was used for statistical analysis.

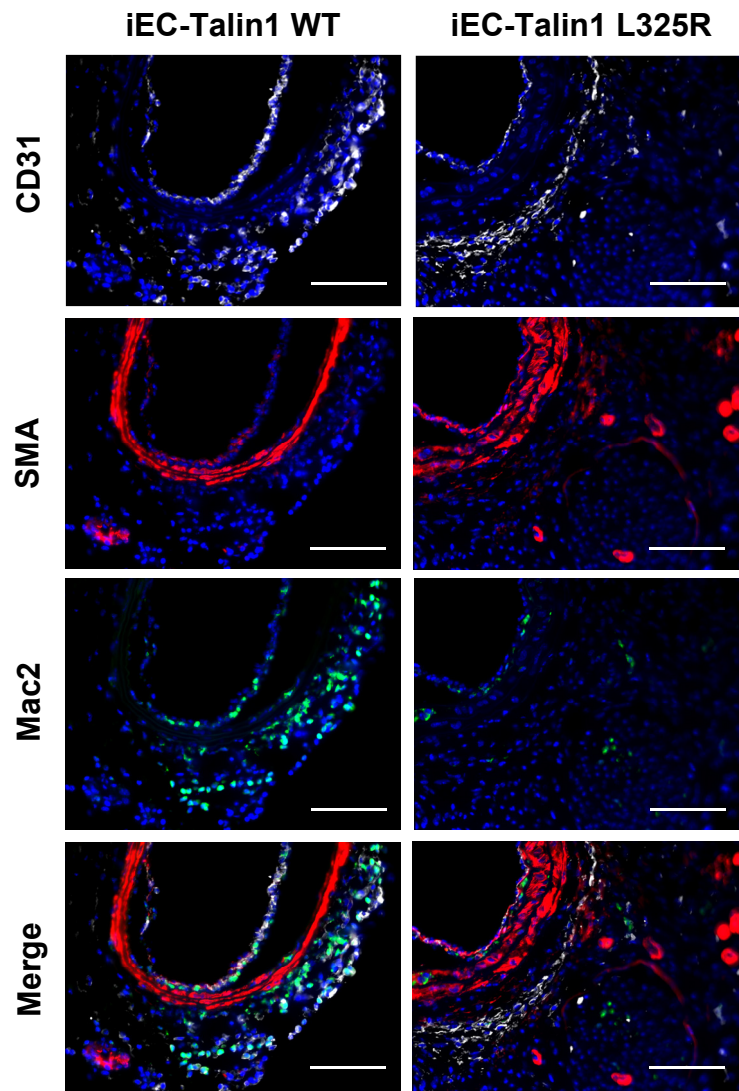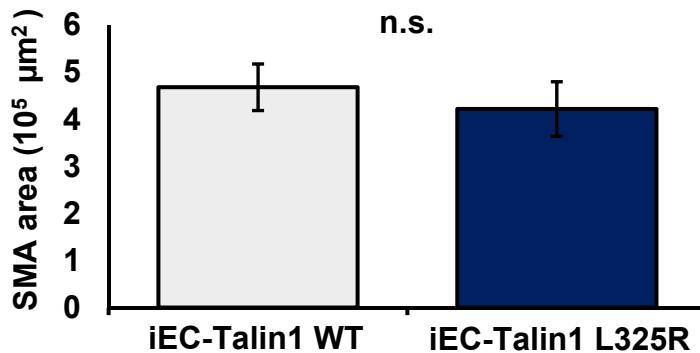

**Supplemental Figure X. Impaired Talin1-Dependent Integrin Activation Does Not Affect Endothelial Coverage or Smooth Muscle Cell Content.** Seven days after partial carotid ligation, the left carotid was examined by immunohistochemistry for endothelial cells (CD31, white), smooth muscle cells (SMA, red), macrophages (Mac2, green), and counterstained with DAPI (blue) to show nuclei. Representative images are shown.  $n=5-6$ . Values are means  $\pm$ SE. n.s. indicates not significant. Scale bars = 100  $\mu\text{m}$ . Student t test was used for statistical analysis.
